# Supplementary material for: A Novel Next-Generation Sequencing and Analysis Platform to Assess the Identity of Recombinant Adeno-Associated Viral Preparations from Viral DNA Extracts
Source: PubMed Central journal article supplement — Hum Gene Ther. 2020 Jun 12;31(11-12):664–78. doi: 10.1089/hum.2019.277 (PMC7310222; doi:10.1089/hum.2019.277), 2020-06-12
Supplement: Suppl_FigS1.pdf [file Suppl_FigS1.pdf]

### 37825 High Molecular Weight Band

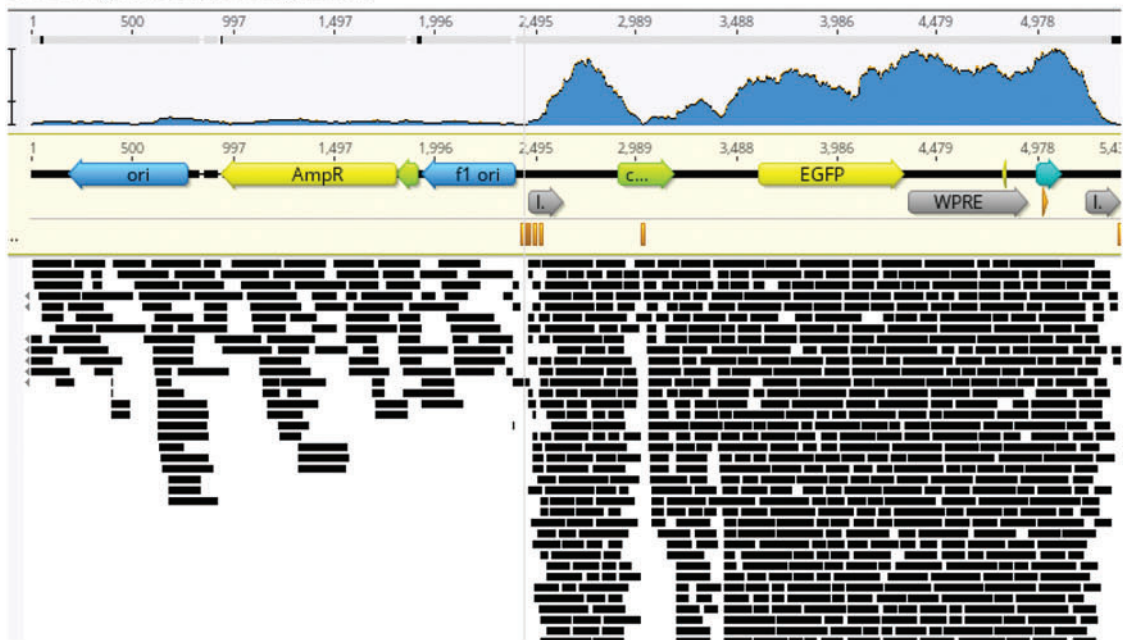

### 37825 Low Molecular Weight Band

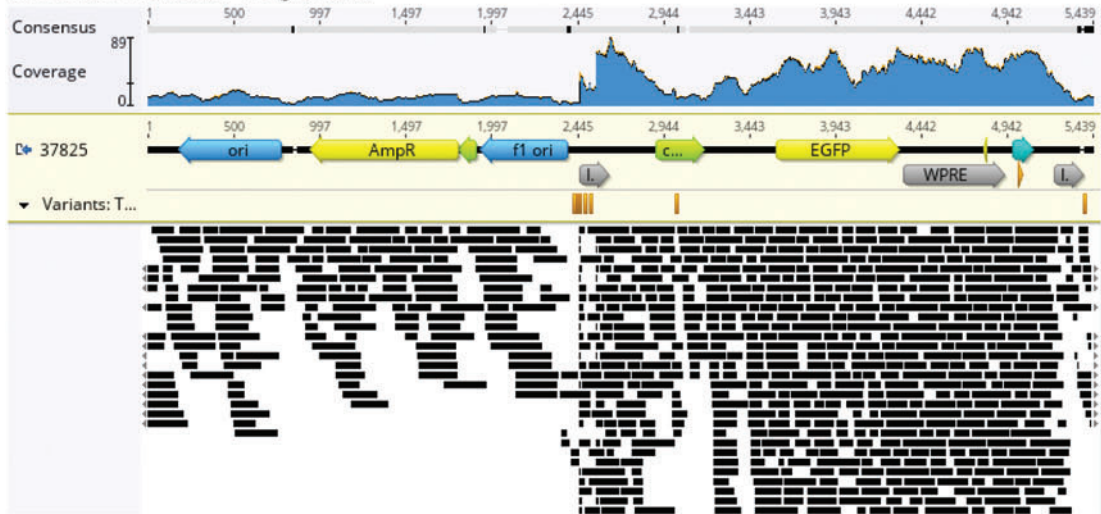

### ΦX174 DNA

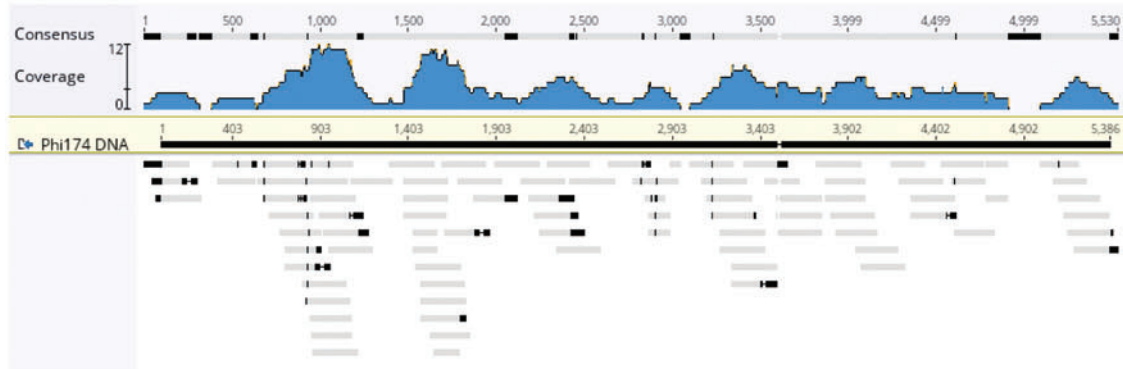

**Supplementary Figure S1.** Analysis of VGS data from agarose gel extracted DNA. (Top and middle panels) High- and low-molecular-weight bands were extracted and submitted for VGS. Reads were aligned to the reference *cis* plasmid. (Bottom panel) ΦX174 DNA was submitted for VGS, and reads were aligned to the reference sequence. VGS, viral genome sequencing.
