# Supplementary material for: A Novel Next-Generation Sequencing and Analysis Platform to Assess the Identity of Recombinant Adeno-Associated Viral Preparations from Viral DNA Extracts
Source: PubMed Central journal article supplement — Hum Gene Ther. 2020 Jun 12;31(11-12):664–78. doi: 10.1089/hum.2019.277 (PMC7310222; doi:10.1089/hum.2019.277), 2020-06-12
Supplement: Suppl_TableS1-S5.pdf [file Suppl_TableS1-S5.pdf]

## Supplementary Data

**Supplementary Table S1.** Results of 37825 agarose gel extracted adeno-associated viral genomic DNA

| <i>Band</i> | <i>Total Reads</i> | <i>Reads Aligned to Reference</i> | <i>No. of Unmapped Reads</i> |
|-------------|--------------------|-----------------------------------|------------------------------|
| Low MW      | 1478               | 1129                              | 349                          |
| High MW     | 2730               | 2469                              | 261                          |

MW, molecular weight.

**Supplementary Table S2.** Next-generation sequencing read data for recombinant adeno-associated viral vector lots

| <i>Cis Plasmid Addgene ID</i> | <i>Serotype</i> | <i>Total Trimmed Reads</i> |
|-------------------------------|-----------------|----------------------------|
| 112005                        | AAV5            | 48,200                     |
| 50459                         | AAV5            | 49,042                     |
| 105553                        | AAVrg           | 70,066                     |
| 20298                         | AAV1            | 57,892                     |
| 20298                         | AAV5            | 50,976                     |
| 44332                         | AAV5            | 44,848                     |
| 50477                         | AAV8            | 53,618                     |
| 44361                         | AAV2            | 41,782                     |
| 111067                        | AAV5            | 78,678                     |
| 50477                         | AAV8            | 92,986                     |
| 100844                        | AAV1            | 66,916                     |
| 105537                        | AAV1            | 41,912                     |
| 105537                        | AAV8            | 87,822                     |
| 51502                         | AAV1            | 59,492                     |
| 100851                        | AAV1            | 87,756                     |
| 45185                         | AAV9            | 65,084                     |
| 105677                        | AAV1            | 74,394                     |
| 100838                        | AAV1            | 46,976                     |
| 51502                         | AAV9            | 41,138                     |
| 112164                        | AAV1            | 49,460                     |
| 108912                        | AAV9            | 24,254                     |
| 100850                        | AAV1            | 71,480                     |
| 114472                        | AAV2            | 60,428                     |
| 50459                         | AAV8            | 28,364                     |
| 65417                         | AAV8            | 22,422                     |
| 100852                        | AAV1            | 20,808                     |
| 105539                        | AAV1            | 15,958                     |
| 105545                        | AAV2            | 40,246                     |
| 60227                         | AAV1            | 50,932                     |
| 26971                         | AAV1            | 51,824                     |
| 59170                         | AAV1            | 46,026                     |
| 105545                        | AAV1            | 32,410                     |
| 107787                        | AAV8            | 29,602                     |
| 100843                        | AAV9            | 48,840                     |
| 44362                         | AAV8            | 64,430                     |
| 99130                         | AAV1            | 70,408                     |
| 104493                        | AAV1            | 51,404                     |
| 106183                        | AAV1            | 65,246                     |
| 106185                        | AAV1            | 48,656                     |
| 112163                        | AAV1            | 67,346                     |

(continued)

**Supplementary Table S2.** (Continued)

| <i>Cis Plasmid Addgene ID</i> | <i>Serotype</i> | <i>Total Trimmed Reads</i> |
|-------------------------------|-----------------|----------------------------|
| 18917                         | AAV1            | 29,812                     |
| 18917                         | AAV9            | 34,628                     |
| 121539                        | AAV1            | 42,234                     |
| 121538                        | AAV1            | 31,440                     |
| 44361                         | AAV8            | 38,452                     |
| 27056                         | AAV9            | 45,554                     |
| 26966                         | AAV9            | 33,366                     |
| 50475                         | AAV2            | 36,030                     |
| 37120                         | AAVrg           | 6,948                      |
| 104488                        | AAV1            | 33,048                     |
| 28306                         | PHPeB           | 39,940                     |
| 44361                         | AAV2            | 29,304                     |
| 44361                         | AAV2            | 14,962                     |
| 111568                        | AAV5            | 20,724                     |
| 44362                         | AAV5            | 33,528                     |
| 37120                         | AAVrg           | 4,470                      |
| 44362                         | AAV2            | 6,252                      |
| 58909                         | AAV5            | 21,044                     |
| 112164                        | AAV1            | 44,314                     |
| 26973                         | AAV9            | 20,360                     |
| 115893                        | AAV8            | 49,162                     |
| 105540                        | AAV1            | 10,168                     |
| 115892                        | AAV8            | 19,072                     |
| 20298                         | AAV9            | 25,126                     |
| 100833                        | AAV9            | 25,898                     |
| 50475                         | AAV8            | 27,064                     |
| 104492                        | AAV9            | 18,414                     |
| 104061                        | PHPeB           | 17,048                     |
| 107787                        | AAV8            | 12,176                     |
| 44361                         | AAV5            | 13,340                     |
| 84445                         | AAV5            | 13,020                     |
| 112005                        | AAV5            | 12,466                     |
| 62726                         | AAV8            | 39,178                     |
| 28306                         | AAV1            | 31,184                     |
| 105679                        | AAV5            | 38,332                     |
| 37825                         | AAVrg           | 3,480                      |
| 50457                         | AAVrg           | 6,706                      |
| 121538                        | AAV5            | 26,036                     |
| 105545                        | AAV8            | 9,870                      |
| 49124                         | AAV1            | 9,140                      |
| 106186                        | AAV2            | 5,460                      |
| 119036                        | AAV1            | 1,238                      |
| 121539                        | AAV5            | 26,780                     |
| 114472                        | AAV8            | 3,608                      |
| 26969                         | AAV5            | 4,538                      |
| 55637                         | AAVrg           | 35,472                     |
| 50457                         | AAVrg           | 62,060                     |
| 111067                        | AAV5            | 10,222                     |
| 44362                         | AAV5            | 42,634                     |
| 104492                        | AAV1            | 41,816                     |
| 100837                        | AAV1            | 50,572                     |
| 105530                        | AAV1            | 40,104                     |
| 99121                         | AAV1            | 77,618                     |

(continued)

**Supplementary Table S2.** (Continued)

| Cis Plasmid Addgene ID | Serotype | Total Trimmed Reads |
|------------------------|----------|---------------------|
| 114472                 | AAV5     | 58,988              |
| 59462                  | AAVrg    | 27,778              |
| 37825                  | AAV5     | 38,240              |
| 26975                  | AAV5     | 32,488              |
| 99120                  | AAV1     | 28,892              |
| 44361                  | AAV2     | 16,180              |
| 100834                 | AAV1     | 25,702              |
| 44362                  | AAV8     | 20,236              |
| 37120                  | AAVrg    | 24,108              |
| 75033                  | AAV1     | 25,178              |
| 112010                 | AAV9     | 36,540              |
| 104488                 | AAV9     | 37,048              |
| 50459                  | AAV8     | 36,444              |
| 105540                 | AAVrg    | 15,834              |
| 50459                  | AAVrg    | 12,600              |
| 87306                  | AAV1     | 68,464              |
| 49124                  | AAV1     | 33,168              |
| 106186                 | AAV2     | 67,858              |
| 119036                 | AAV1     | 29,548              |
| 114472                 | AAV8     | 64,348              |
| 26969                  | AAV5     | 42,106              |
| 104496                 | AAV1     | 66,780              |
| 105553                 | AAVrg    | 65,072              |
| 50942                  | AAV1     | 118,108             |
| 44361                  | AAV8     | 84,768              |
| 104492                 | AAV1     | 93,336              |
| 119741                 | AAV5     | 39,924              |

AAV, adeno-associated virus.

**Supplementary Table S3.** pAAV-CAG-GFP-specific percentage of unmapped reads across serotypes

| Serotype | Total Reads | Unused Reads | Percentage of Unused Reads | Unused Reads Mapping to Cap | Percentage of Unmapped Reads Hitting Cap |
|----------|-------------|--------------|----------------------------|-----------------------------|------------------------------------------|
| AAV1     | 87,326      | 1,169        | 1.34                       | 104                         | 8.90                                     |
| AAV2     | 40,108      | 1,078        | 2.69                       | 463                         | 42.95                                    |
| AAV5     | 38,222      | 999          | 2.61                       | 145                         | 14.51                                    |
| AAV8     | 59,932      | 1,076        | 1.80                       | 109                         | 10.13                                    |
| AAV9     | 57,076      | 1,415        | 2.48                       | 132                         | 9.33                                     |
| AAVrg    | 32,578      | 768          | 2.36                       | 173                         | 22.53                                    |
| Php.EB   | 41,607      | 687          | 1.65                       | 64                          | 9.32                                     |

AAV, adeno-associated virus.

**Supplementary Table S4.** pAAV-hSyn-EGFP-specific percentage of unmapped reads across serotypes

| Serotype | Total Reads | Unused Reads | Percentage of Unused Reads | Unused Reads Mapping to Cap | Percentage of Unmapped Reads Hitting Cap |
|----------|-------------|--------------|----------------------------|-----------------------------|------------------------------------------|
| AAV1     | 49,324      | 930          | 1.89                       | 47                          | 5.05                                     |
| AAV2     | 36,188      | 503          | 1.39                       | 160                         | 31.81                                    |
| AAV5     | 68,222      | 1,245        | 1.82                       | 224                         | 17.99                                    |
| AAV8     | 57,888      | 834          | 1.44                       | 40                          | 4.80                                     |
| AAV9     | 74,948      | 837          | 1.12                       | 98                          | 11.71                                    |
| AAVrg    | 36,188      | 503          | 1.39                       | 155                         | 30.82                                    |

AAV, adeno-associated virus.

**Supplementary Table S5.** Key resources

| Reagent or Resource                                  | Source                           | Identifier                                                                          |
|------------------------------------------------------|----------------------------------|-------------------------------------------------------------------------------------|
| Chemicals, peptides, and recombinant proteins        |                                  |                                                                                     |
| Polyethylenimine, linear, MW 25,000                  | Alfa Aesar                       | 43896-03                                                                            |
| OptiMEM                                              | Thermo Fisher                    | 31985-070                                                                           |
| TrypLE Express Enzyme (1 ×), phenol red              | Thermo Fisher                    | 12605010                                                                            |
| Fetal bovine serum                                   | Seradigm                         | 1500-500                                                                            |
| DMEM                                                 | Corning                          | 10-013-CV                                                                           |
| EMEM                                                 | Corning                          | 10-009-CV                                                                           |
| PBS (1 ×)                                            | Corning                          | 21-040-CV                                                                           |
| Pluronic F-68                                        | Thermo Fisher                    | 24040032                                                                            |
| Qiagen's endotoxin-free HiSpeed Gigaprep kit         | Qiagen                           | 1054575                                                                             |
| ΦX174 DNA                                            | New England Biolabs              | N3023S                                                                              |
| <i>SacI</i>                                          | New England Biolabs              | R0157S                                                                              |
| <i>HaeIII</i>                                        | New England Biolabs              | R0108S                                                                              |
| 1 kb DNA ladder                                      | New England Biolabs              | N3232S                                                                              |
| Trypan blue                                          | Thermo Fisher                    | T10282                                                                              |
| Benzonase nuclease                                   | Millipore                        | 71205-3                                                                             |
| PureLink Viral RNA/DNA purification Kit              | Thermo Fisher                    | 12280050                                                                            |
| Iodixanol (OptiPrep)                                 | Sigma                            | D1556-250                                                                           |
| pHrodo dextran                                       | Thermo Fisher                    | P35368                                                                              |
| Amcon Ultra-15 Centrifugal Filter Unit               | Millipore                        | UFC910024                                                                           |
| QIAquick PCR Purification Kit                        | Qiagen                           | 28104                                                                               |
| PowerUp SYBR Green Master Mix                        | Thermo Fisher                    | A25741                                                                              |
| Experimental models: cell lines                      |                                  |                                                                                     |
| AAVpro 293T                                          | Clontech                         | 632273                                                                              |
| Neuro2a                                              | American Type Culture Collection | ATCC CCL-13                                                                         |
| Recombinant DNA                                      |                                  |                                                                                     |
| pAAV-CAG-GFP                                         | Addgene                          | 37825                                                                               |
| pAAV-hSyn-EGFP                                       | Addgene                          | 50465                                                                               |
| pAAV-EF1a-double floxed-hChR2(H134R)-EYFP-WPRE-HGHpA | Addgene                          | 20298                                                                               |
| AAV-Cre-GFP                                          | Addgene                          | 68544                                                                               |
| AAV-EF1a-DIO-GCaMP6s-P2A-nls-dTomato                 | Addgene                          | 51082                                                                               |
| AAV-FLEX- <i>rev</i> -ChR2(H134R)-mCherry            | Addgene                          | 18916                                                                               |
| rAAV2-retro helper                                   | Addgene                          | 81070                                                                               |
| Software                                             |                                  |                                                                                     |
| Geneious Prime version 2019.1.1 (1.0)                | Biomatters, Ltd.                 |                                                                                     |
| Addgene/open-bio                                     | Addgene                          | <a href="https://github.com/addgene/openbio">https://github.com/addgene/openbio</a> |

AAV, adeno-associated virus; DMEM, Dulbecco's Modified Eagle Medium; EMEM, Eagle's Minimum Essential Medium; PBS, Phosphate buffered saline.

### 37825 High Molecular Weight Band

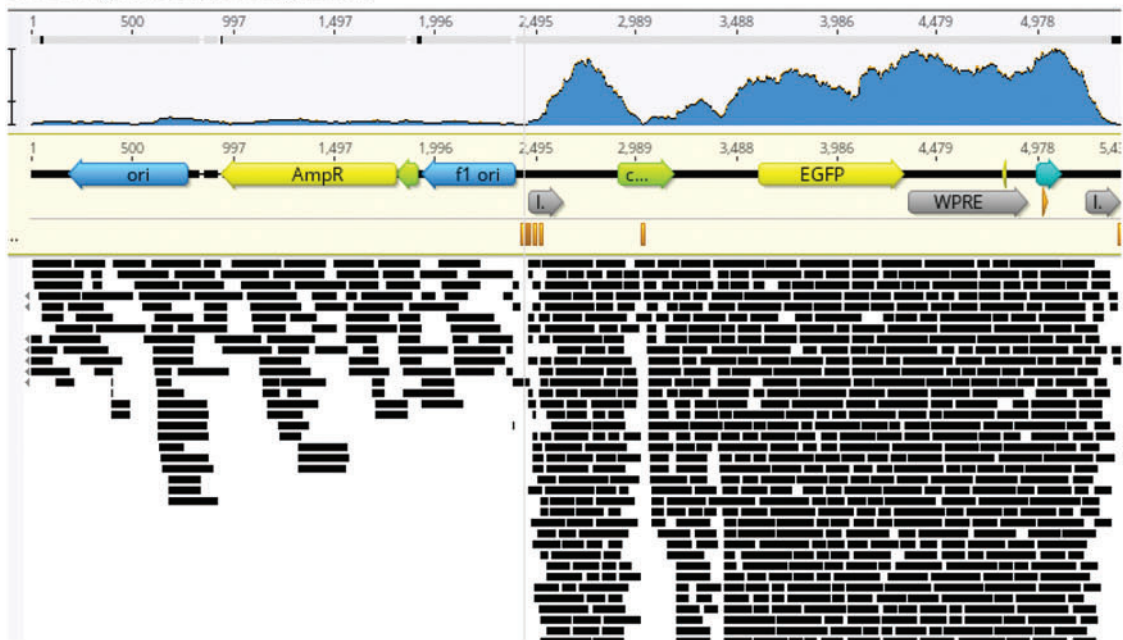

### 37825 Low Molecular Weight Band

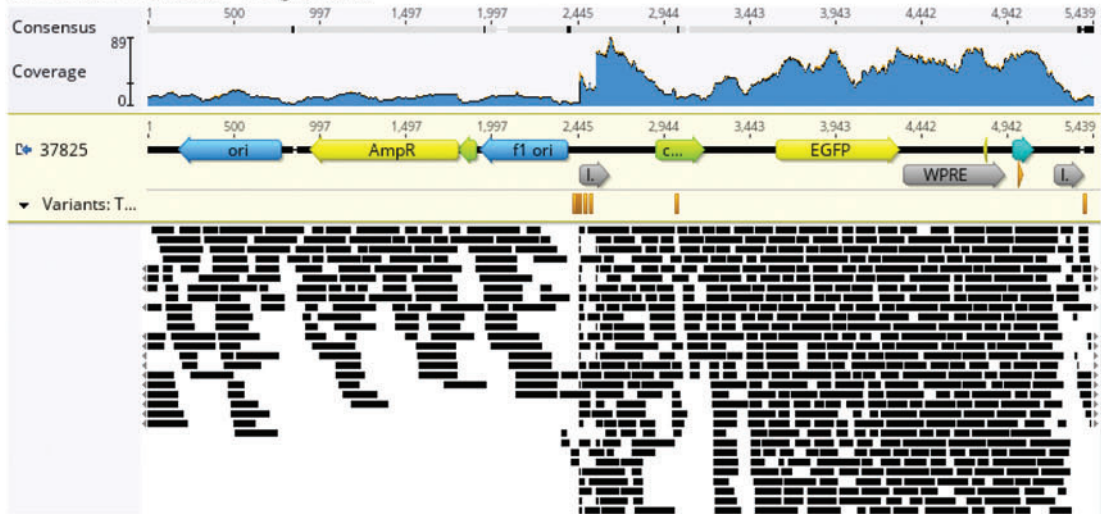

### ΦX174 DNA

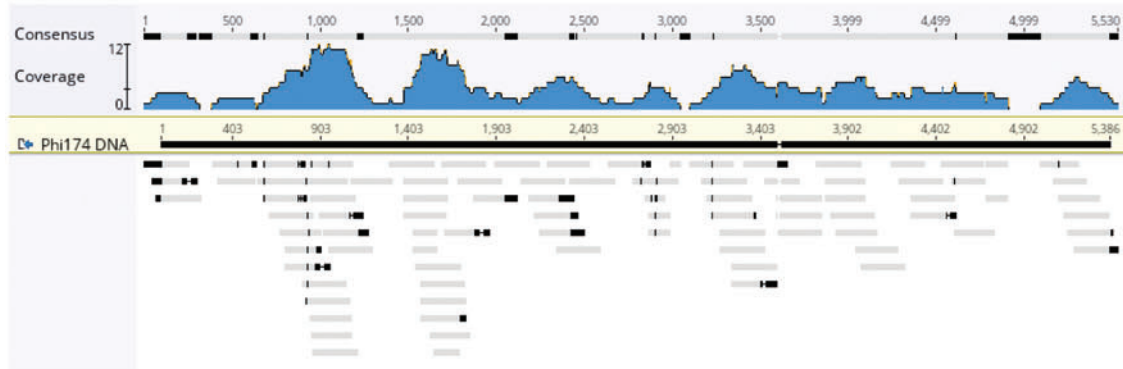

**Supplementary Figure S1.** Analysis of VGS data from agarose gel extracted DNA. (Top and middle panels) High- and low-molecular-weight bands were extracted and submitted for VGS. Reads were aligned to the reference *cis* plasmid. (Bottom panel) ΦX174 DNA was submitted for VGS, and reads were aligned to the reference sequence. VGS, viral genome sequencing.
